# Supplementary material
Source: PubMed Central journal article supplement (PMC7645743)

## Supplemental Online Content

Mir TA, Papudesu C, Fang W, Hinkle DM. Incidence of drug abuse–related endogenous endophthalmitis hospitalizations in the United States, 2003 to 2016. *JAMA Ophthalmol*. Published online November 5, 2020.  
doi:10.1001/jamaophthalmol.2020.4741

**eFigure.** Regional Comparison of Incidence Rate of Endogenous Endophthalmitis

This supplemental material has been provided by the authors to give readers additional information about their work.

eFigure.

A) Regional Comparison of Incidence Rate of Endogenous Endophthalmitis

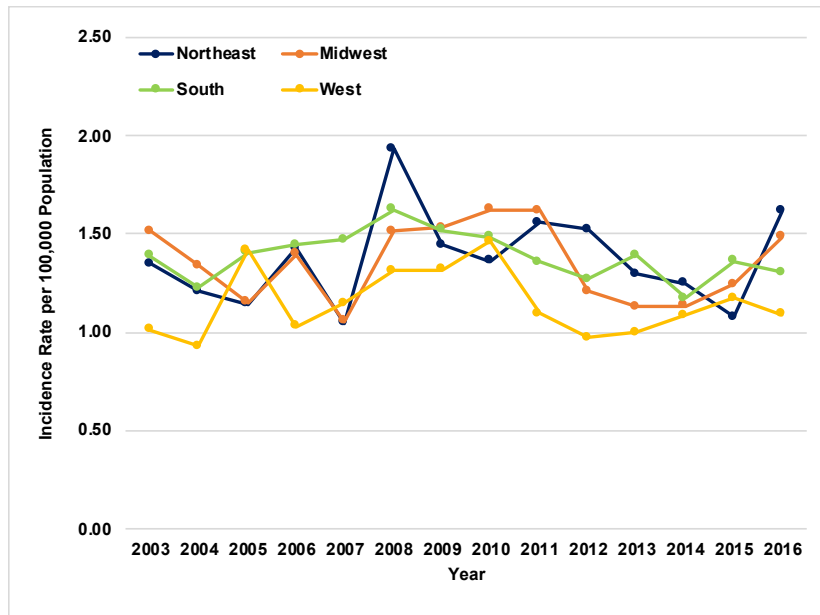

B) Regional Comparison of Incidence Rate of Endogenous Endophthalmitis Among Related to Drug Dependence or Abuse

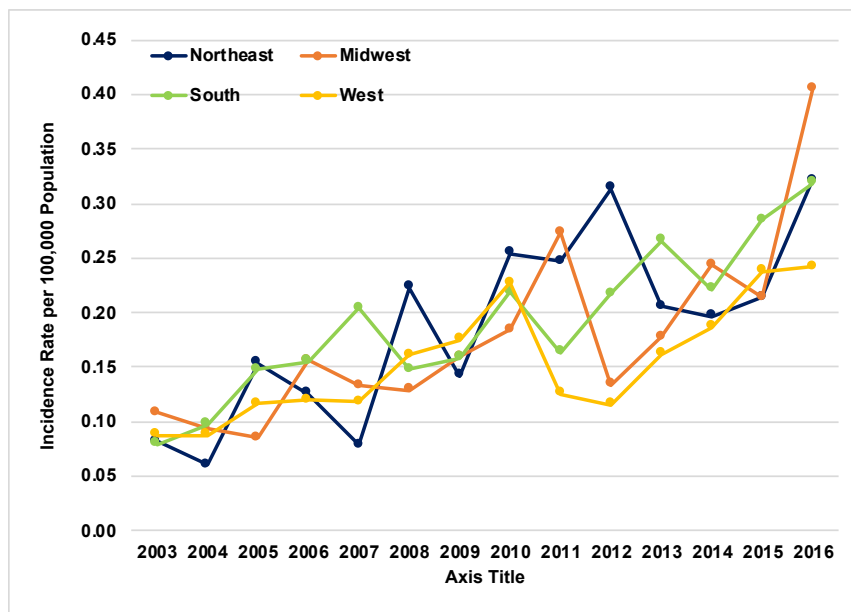

Supplement: jamaophthalmol-e204741-s001.pdf [file jamaophthalmol-e204741-s001.pdf]
